# Supplementary material
Source: bioRxiv or medRxiv preprint supplement (https://www.biorxiv.org/highwire/filestream/66262/field_highwire_adjunct_files/2/175810-3.pdf)

A

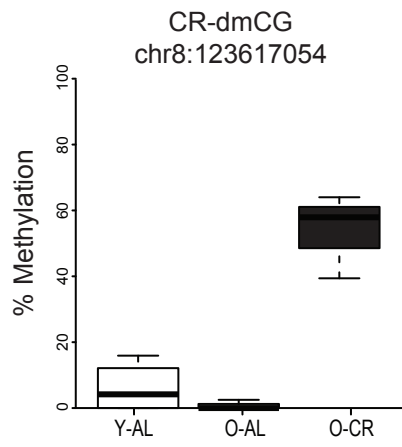

B

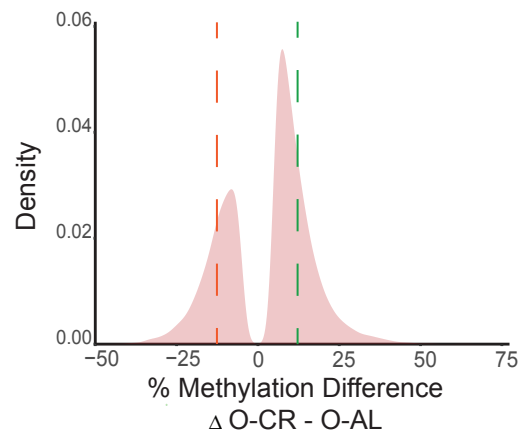

C

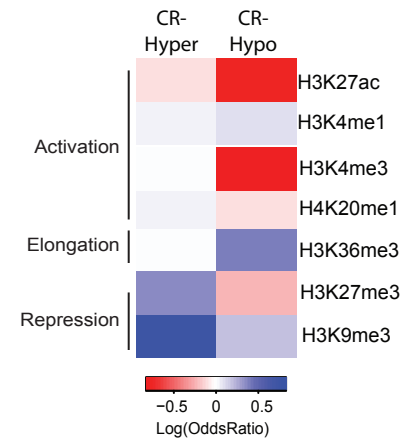

Supplement: Supplementary file [file 175810-3.pdf]
